# Supplementary material for: Widespread amyloidogenicity potential of multiple myeloma patient-derived immunoglobulin light chains
Source: PubMed Central journal article supplement (PMC9898917; doi:10.1186/s12915-022-01506-w), 2023-02-03
Supplement: 12915_2022_1506_MOESM1_ESM.pdf [file 12915_2022_1506_MOESM1_ESM.pdf]

1 **A Additional file 1**

2 **Table 1.** Patient characteristics at the time of examination. The samples were taken at the time point of diagnosis. The patients  
 3 are categorised according to their CKD stage: Group I "good" stage 1+2, n=5 (P004, P007, P011, P017, P020), Group II  
 4 intermediate stage 3, n=4 (P001, P005, P013, P016) and Group III bad stage 4+5, n=1 (P006). Apart from P007, which  
 5 presented an acute kidney injury, all patients had a chronically damaged kidney.

6

| Patient | Age | Gender | Disease type | Isotype | FLC Serum [mg/l] | FLC Urine [mg/l] | TPU [g/24h] | Kidney function creatinin [mg/dl] | GFR-CKD-EPI [ml/min] | CKD Stadium | Kidney function recovered? Improvement = 30% | Kidney function recovered Creatinine [mg/dl] |
|---------|-----|--------|--------------|---------|------------------|------------------|-------------|-----------------------------------|----------------------|-------------|----------------------------------------------|----------------------------------------------|
| P001    | 47  | male   | MM           | λ       | 3750             | 1060             | 13          | 1.3                               | 50                   | 3           | Yes                                          | 0.9                                          |
| P004    | 72  | male   | MM           | κ       | 5280             | 7650             | 4           | 1.1                               | 90                   | 1           | Yes                                          | 0.9                                          |
| P005    | 65  | female | MM           | κ       | 1250             | 6140             | 3           | 1.2                               | 48                   | 3           | n/a                                          | acute kidney injury                          |
| P006    | 66  | female | MM           | κ       | 2460             | 6880             | 3           | 1.9                               | 27                   | 4           | Yes                                          | 1.3                                          |
| P007    | 54  | male   | MM           | κ       | 898              | n/a              | 1           | 1                                 | 83                   | 2           | No                                           | 1.3                                          |
| P011    | 45  | female | AL           | λ       | 120              | n/a              | 6.2         | 0.7                               | 108                  | 1           | No                                           | 0.8                                          |
| P013    | 65  | male   | MM           | κ       | 11000            | n/a              | 3           | 1.5                               | 50                   | 3           | No                                           | 1.7                                          |
| P016    | 59  | male   | MM           | κ       | 1150             | 175              | 3           | 1.6                               | 45                   | 3           | No                                           | 1.2                                          |
| P017    | 72  | female | MM           | κ       | 1380             | n/a              | 4           | 0.7                               | 90                   | 1           | No                                           | 0.8                                          |
| P020    | 64  | female | MM           | κ       | 4120             | n/a              | 2.4         | 0.8                               | 74                   | 2           | n/a                                          | 0.9                                          |

7

8



|      |                                                              |                            |                |          |       |                        |
|------|--------------------------------------------------------------|----------------------------|----------------|----------|-------|------------------------|
|      |                                                              | FR1                        | CDR1           | FR2      | CDR2  |                        |
| P001 | GPDLTQPRSVSGSPGQSVTLSCVTGTS                                  | SSDVGGYNYVSWYQQHPGKAPKLMYD | VTKRPSGV       | 60       |       |                        |
| P011 | EAPLTQPPSVSGAPGQRVTLSCVTGSS                                  | SNLGAGWDVHWYQQLPGTVPKLLIY  | ADRNRP         | SGV      | 60    |                        |
|      | ****                                                         | ****:***                   | *****:***:*. * | ****     | **    | ***:***                |
|      |                                                              | FR3                        | CDR3           | FR4      |       |                        |
| P001 | PDRFSGSKSGTTASLTISGLQAEDEADYCCSYAG-                          | IDIFVLF                    | FGGGTKLTVL     | GQPKAAPS | 119   |                        |
| P011 | PERFSGSKSGTSATVAIAGLQAEDEADYCCSYDS                           | ALSGFYV                    | FGTGTKVIVL     | GQPKANPT | 120   |                        |
|      | *:*****:                                                     | *:***:                     | *****          | **       | .     | :. * :** ***: ***** *: |
| P001 | VTLFPPSSEELQANKATLVCLISDFYPQVTVAWKADSSPVKAGVETTPSKQSNNKYAAS  | 179                        |                |          |       |                        |
| P011 | VTIFPPSSEELQANKATLVCLISDFYPQVTVAWKADGSPVKAGVETTKPSKQSNNKYAAS | 180                        |                |          |       |                        |
|      | **:                                                          | *****                      | *****          | *****    | ***** | *****                  |
| P001 | SYLSLTPEQWKSHRSYSCQVTHEGSTVEKTVAPTECS                        | 216                        |                |          |       |                        |
| P011 | SYLSLTPEQWKSHRSYSCQVTHEGSTVEKTVAPTECS                        | 217                        |                |          |       |                        |
|      | *****                                                        | *****                      | *****          | *****    | ***** | *****                  |

**Figure A.2.** Full length sequence alignment of the  $\lambda$  light chains of our study. The framework regions (FR) are marked with blue, the complementarity determining regions (CDRs) with red.

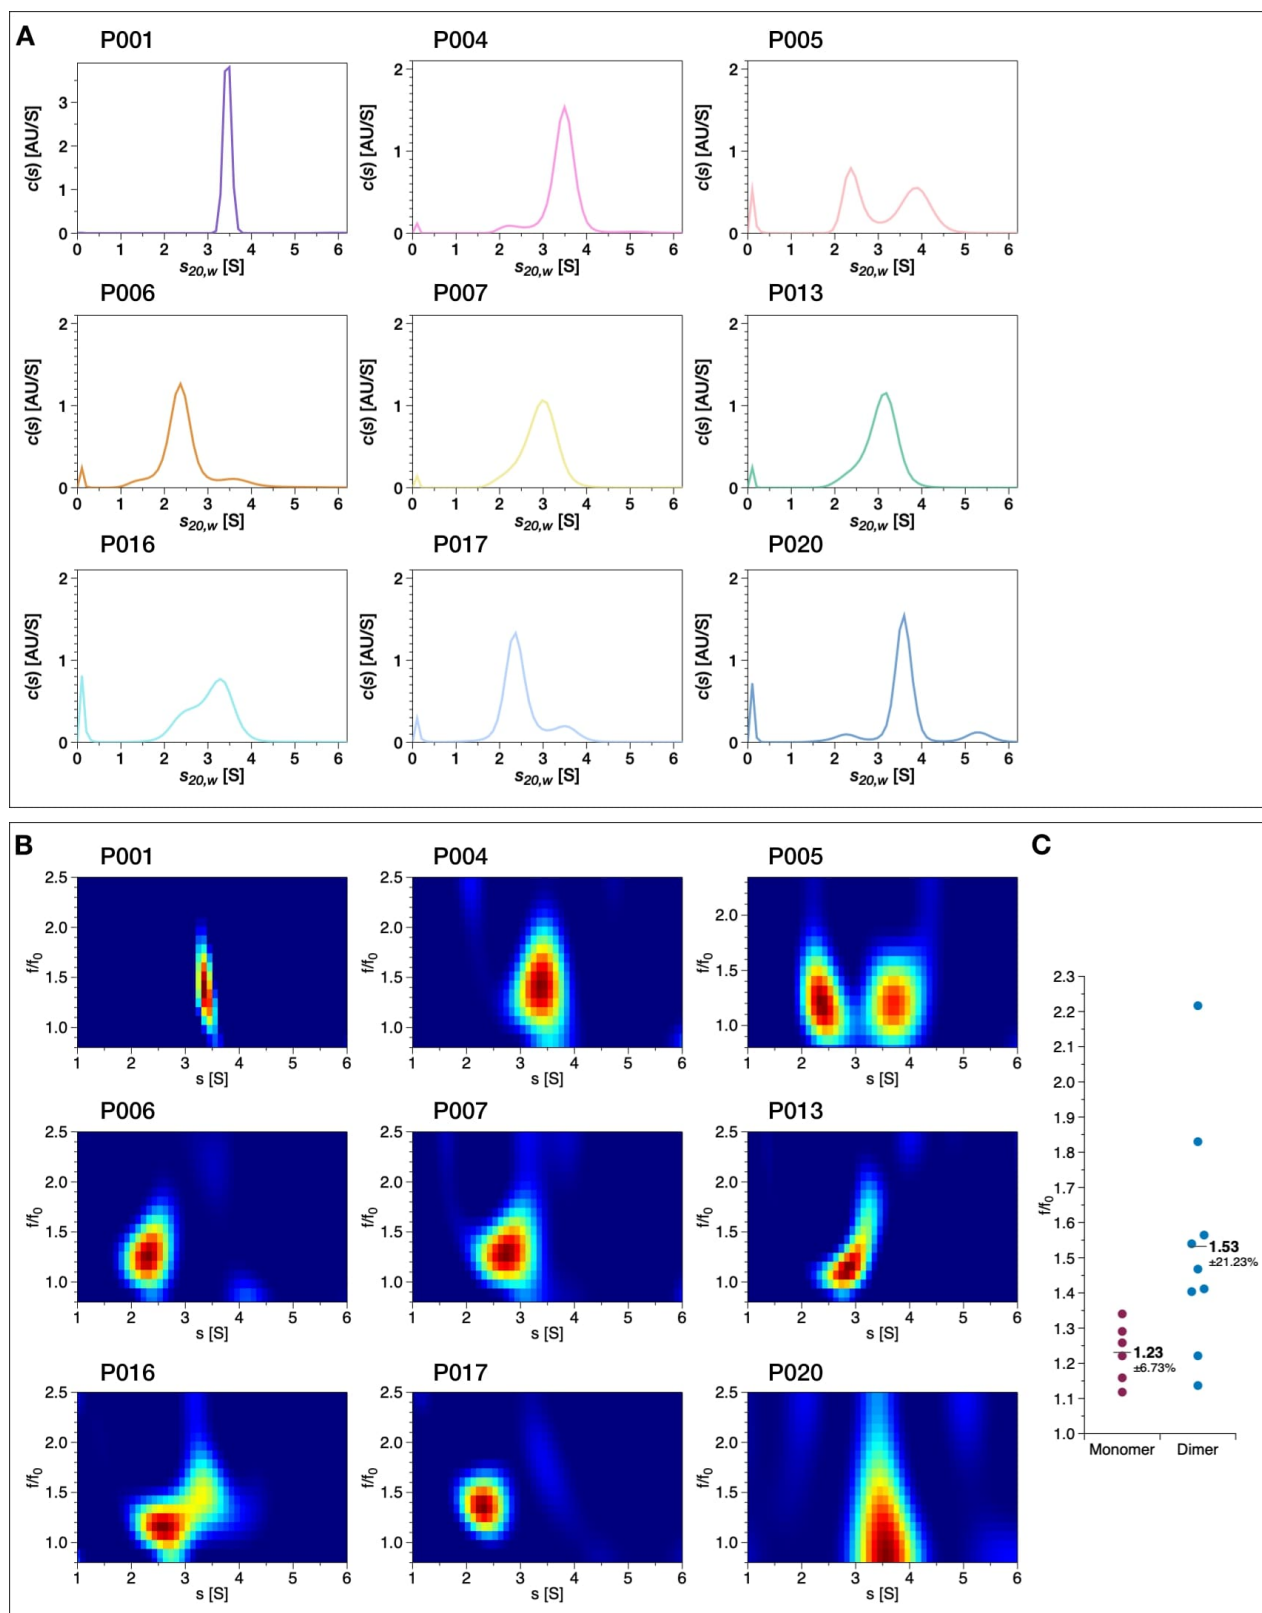

**Figure A.3.** (A) Distribution of sedimentation coefficients ( $c(s)$ ) of the IgLC samples of this study and (B) application of the  $c(s, f/f_0)$ -model determined by sedimentation velocity experiments at 60.000 rpm. We find that the form factors of the dimers differ within the sample set. The dimers can appear very globular e.g. P020 with a  $f/f_0$  of 1.14 or elongated such as P006  $f/f_0$  of 2.22 and P007, P013 and P017  $f/f_0$  between 1.54 and 1.83. However the signal for the dimer of P006 is very low. (C) shows the variation of  $f/f_0$  between the dimers compared to the monomers. The monomers of P004 and P020 were excluded due to their low signal intensity.

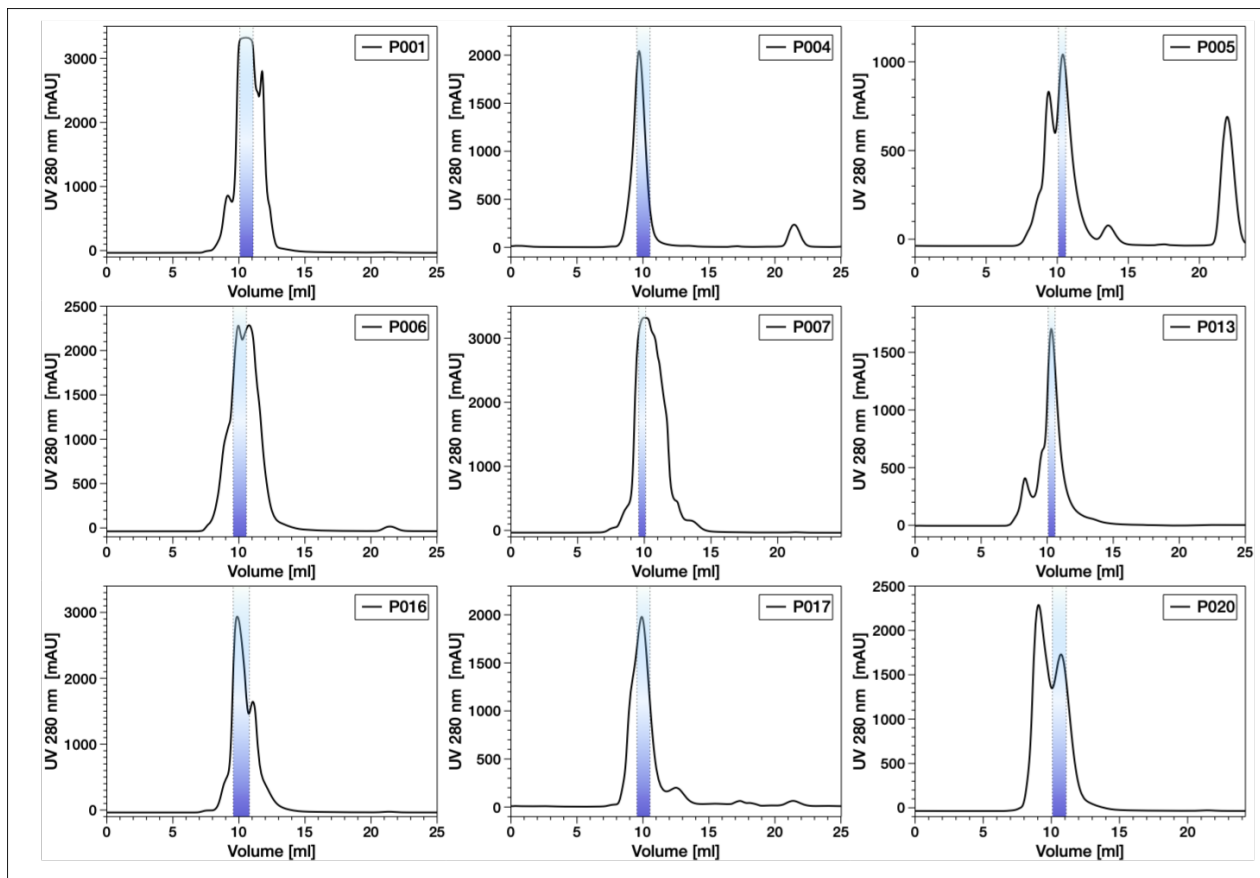

**Figure A.4.** Size exclusion chromatograms of the different IgLC samples of this study. The fractions used for the remaining experiments in this study are marked in blue
